# Supplementary material for: Large-scale microbiome data integration enables robust biomarker identification
Source: PubMed Central journal article supplement (PMC10766547; doi:10.1038/s43588-022-00247-8), 2022-05-23
Supplement: 43588_2022_247_MOESM1_ESM.pdf [file 43588_2022_247_MOESM1_ESM.pdf]

**Supplementary information**

---

**Large-scale microbiome data integration  
enables robust biomarker identification**

---

In the format provided by the  
authors and unedited

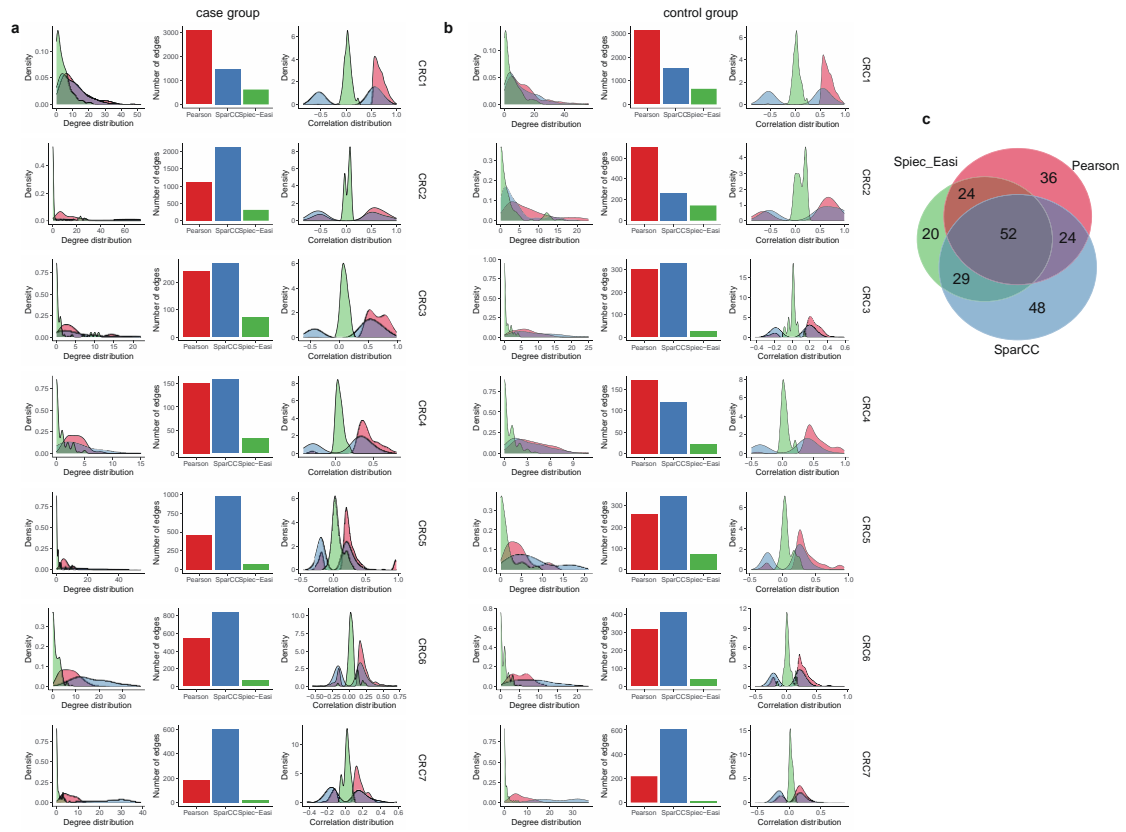

**Supplementary Figure 1. Comparison of different network construction methods. a,** Topological parameters of seven CRC microbial networks in the case group ( $P < 0.01$ ). **b,** Topological parameters of seven CRC microbial networks in the control group ( $P < 0.01$ ). **c,** The overlap of markers identified by NetMoss based on different network construction methods.

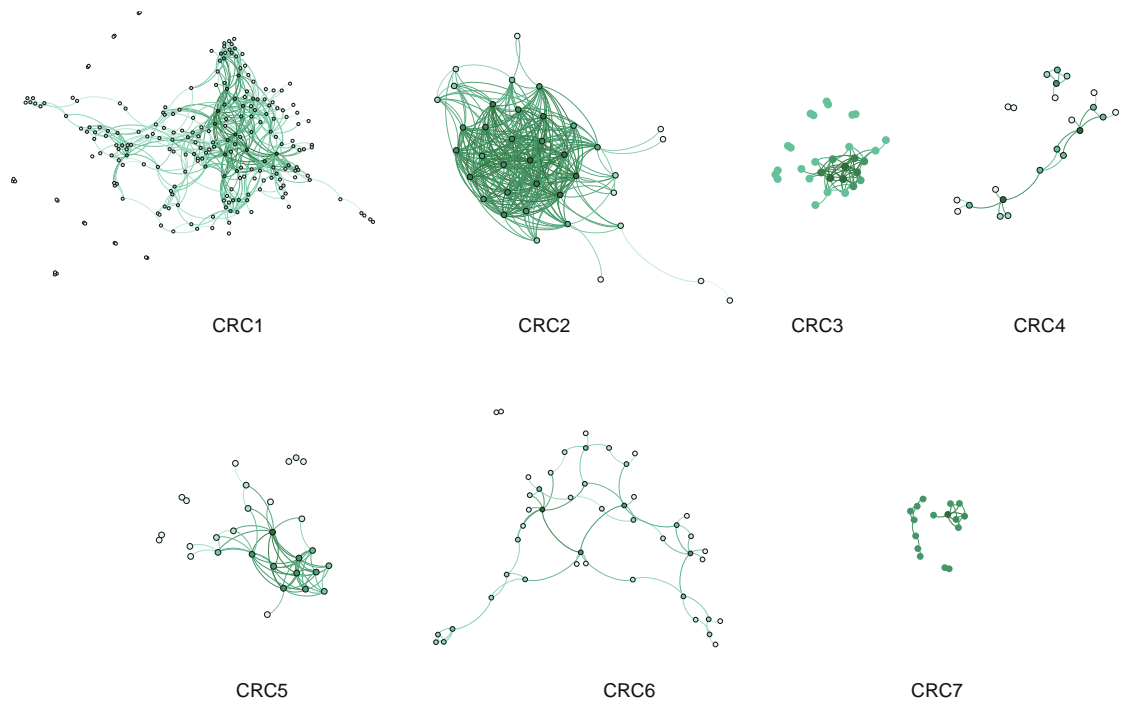

**Supplementary Figure 2. Co-occurrence networks constructed from study CRC 1 – CRC 7.**  
Different colors of dots in the networks represent different network degree.

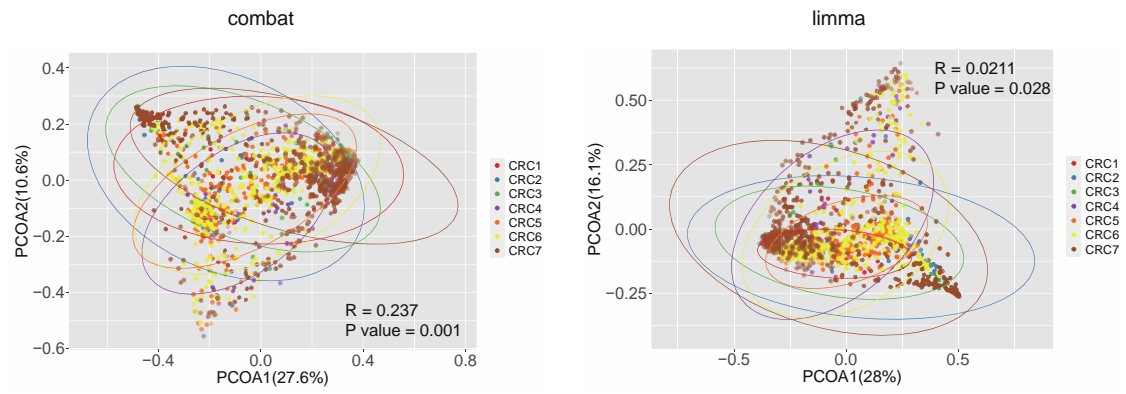

**Supplementary Figure 3. Batch effects of seven datasets based on abundance integration.** Datasets were processed by combat (left) and limma (right), respectively. The color of nodes represents different studies. The circles refer to 95% confidence intervals.

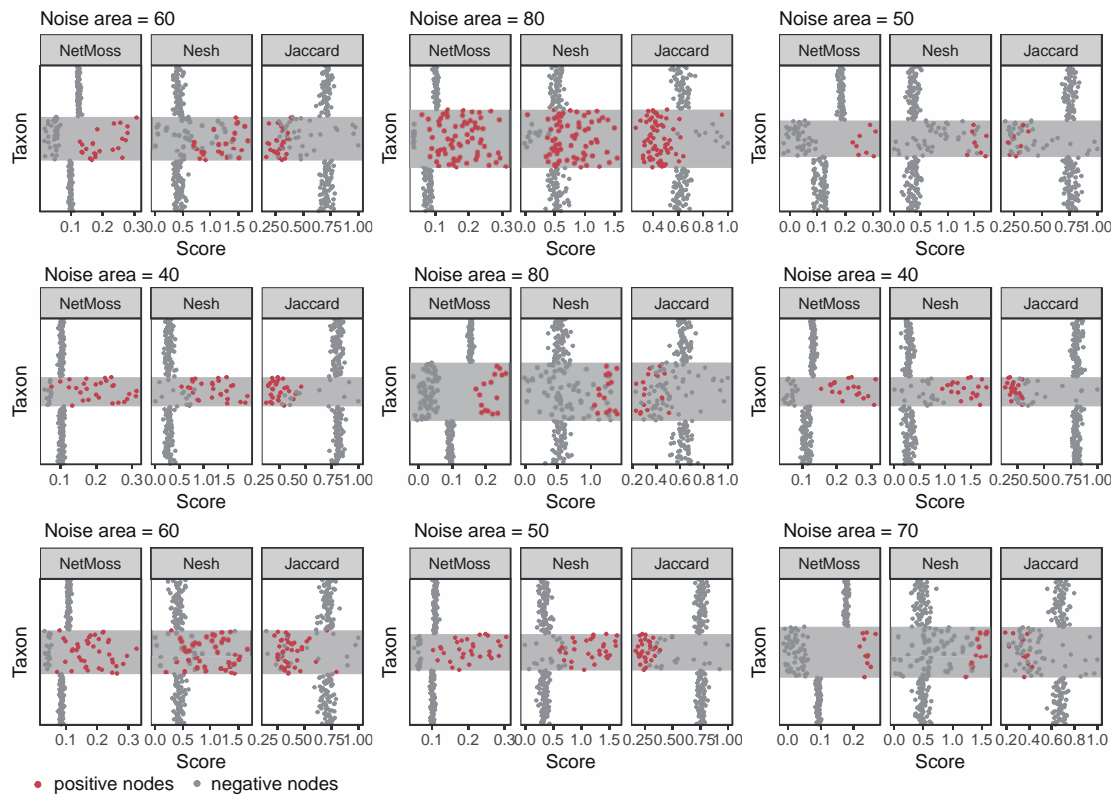

**Supplementary Figure 4. Score distribution of different methods under various noise levels.** Datasets were evaluated by NetMoss score (left), Neighbor shift score (middle), and Jaccard edge index (right), respectively. Red nodes correspond to transited submodules and gray nodes correspond to other submodules. The gray areas in the boxes represent noise areas under different noises.

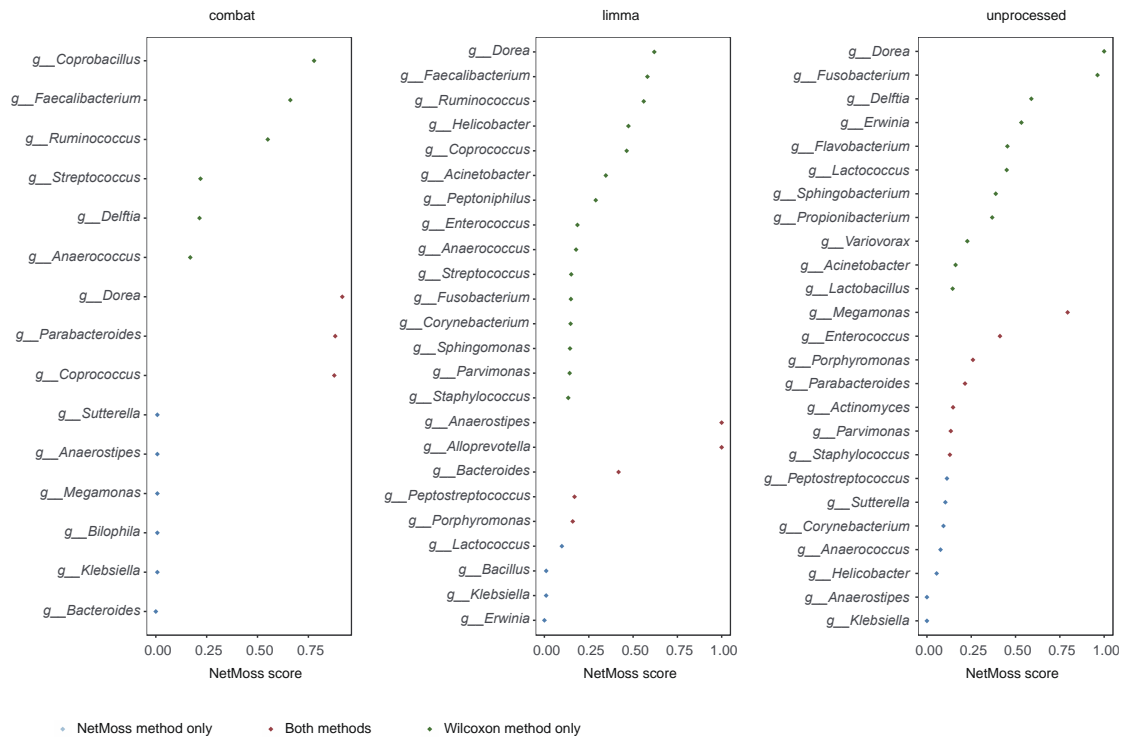

**Supplementary Figure 5. NetMoss score of different processed groups.** Integrated based on abundance and processed by combat (left), limma (middle), or Wilcoxon (right).

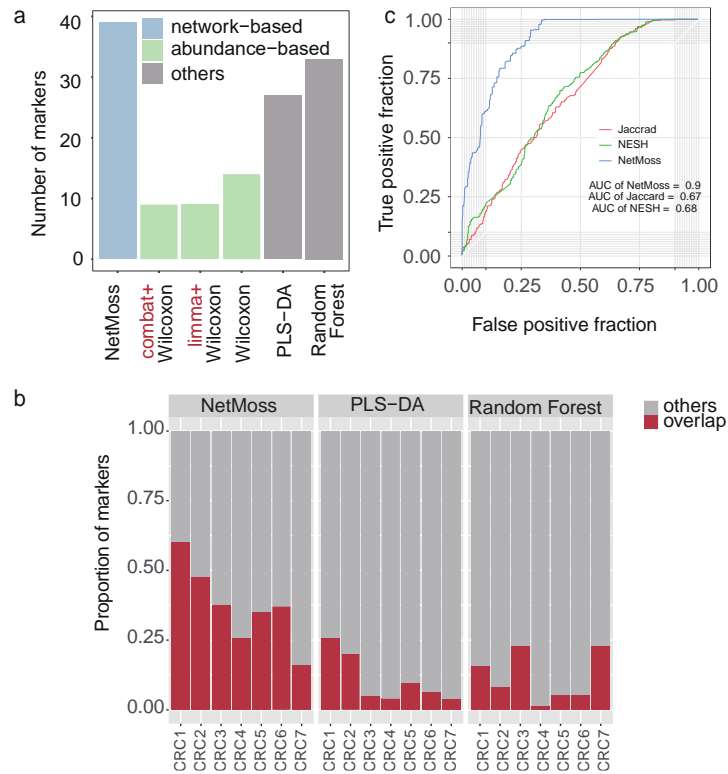

**Supplementary Figure 6. Classification comparison of different methods in seven CRC studies.** a, Number of markers identified by different methods. b, Overlap between markers identified by each study individually and by the combined datasets. c, Prediction power of three network-based methods.

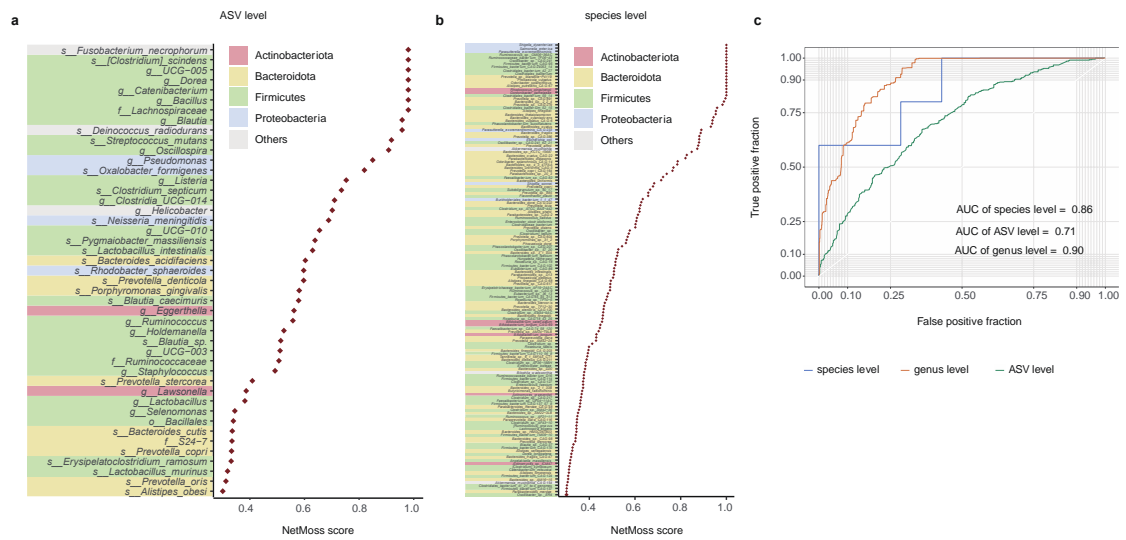

**Supplementary Figure 7. Marker identification at different taxonomic levels.** a, Markers identified by NetMoss at the ASV level. b, markers identified by NetMoss at the species level. c, Prediction power at three different taxonomic levels (genus level and ASV level from 16S dataset, and species level from metagenome dataset).



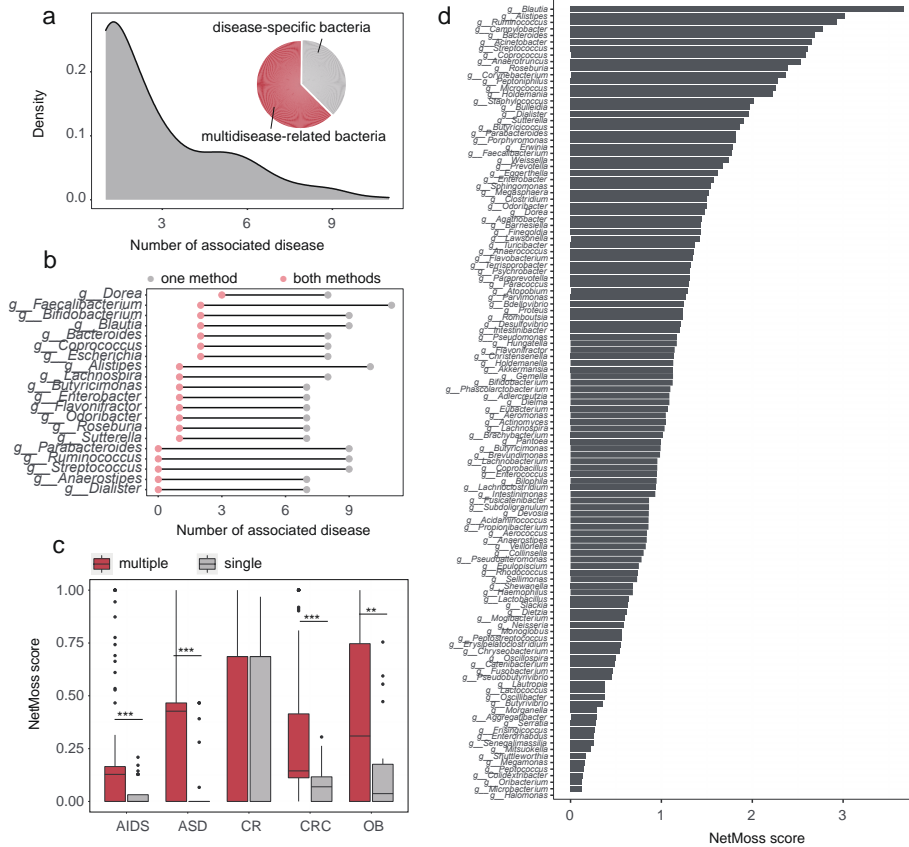

**Supplementary Figure 8. Significant bacteria associated with multiple diseases.** a, The distribution of significant genera associated with various diseases. The small pie plot refers to proportion of disease-specific bacteria and multidisease-related bacteria in the analysis of 12 diseases. b, Top 20 bacteria which are significantly associated with multiple diseases. Pink dots represent significant genera identified by both the abundance-based method and NetMoss. Gray dots represent significant genera identified either by the abundance-based method or NetMoss. c, NetMoss scores of multidisease-related bacteria (red) and disease-specific bacteria (gray) in five diseases. The upper and lower horizontal lines of the box represent the 25th and 75th percentiles respectively, the horizontal midline represents the median, the upper and lower horizontal whiskers lines are the upper and lower limits and the dots are the outliers. Two-sided Wilcoxon test. \*\*\*,  $P < 0.001$ ; \*\*,  $P < 0.01$ ; \*,  $P < 0.05$ . d, NetMoss score of multidisease-related bacteria in the combined network.

**Supplementary Table 1. The microbiota datasets used in this study**

| Dataset | Accession   | #Controls | #Cases | Platform | Country | 16S Region | Sample Type                     |
|---------|-------------|-----------|--------|----------|---------|------------|---------------------------------|
| AC      | PRJNA449243 | 31        | 31     | HiSeq    | China   | V4         | severe pustular acne vulgaris   |
| AITD    | PRJNA450230 | 28        | 74     | HiSeq    | China   | V3-V4      | autoimmune thyroid              |
| AP      | PRJNA214550 | 10        | 26     | 454      | USA     | V1-V2      | appendix and rectal samples     |
| A-P     | PRJNA428226 | 100       | 148    | MiSeq    | USA     | V4         | aspirin                         |
| ART     | PRJNA203810 | 28        | 86     | 454      | USA     | V1-V2      | arthritis                       |
| ASD1    | PRJNA355023 | 24        | 30     | NextSeq  | India   | V3         | autism spectrum disorder        |
| ASD2    | PRJNA282013 | 44        | 59     | MiSeq    | USA     | V1-V2      | autism spectrum disorder        |
| ASD3    | PRJNA327785 | 0         | 40     | MiSeq    | China   | V3-V4      | autism spectrum disorder        |
| CAP     | PRJNA294937 | 0         | 48     | MiSeq    | China   | V3-V4      | community-acquired pneumonia    |
| CDI     | PRJNA270936 | 0         | 25     | 454      | China   | V3-V4      | clostridium difficile infection |
| CDI1    | PRJNA274722 | 56        | 60     | MiSeq    | China   | V3         | clostridium difficile infection |
| CDI2    | PRJNA307992 | 86        | 144    | MiSeq    | USA     | V4         | clostridium difficile infection |
| CHB     | PRJNA382861 | 57        | 206    | MiSeq    | China   | V3-V4      | chronic Hepatitis B             |
| CR1     | PRJNA298762 | 20        | 10     | MiSeq    | Canada  | V3         | Crohn's disease                 |
| CR2     | PRJNA257186 | 36        | 21     | 454      | USA     | V1-V2      | Crohn's disease                 |
| CR3     | PRJNA428898 | 9         | 26     | MiSeq    | China   | V4-V5      | Crohn's disease                 |
| CRC1    | PRJNA288419 | 23        | 23     | 454      | China   | V3         | colorectal cancer               |
| CRC2    | PRJNA269561 | 23        | 35     | HiSeq    | China   | V3         | colorectal cancer               |
| CRC3    | PRJNA430990 | 247       | 36     | MiSeq    | China   | V3-V4      | colorectal cancer               |
| CRC4    | PRJEB6070   | 50        | 79     | HiSeq    | Germany | V4         | colorectal cancer               |
| CRC5    | PRJNA318004 | 141       | 263    | MiSeq    | USA     | V4         | colorectal cancer               |
| CRC6    | PRJNA290926 | 190       | 352    | 454      | USA     | V4         | colorectal cancer               |
| CRC7    | PRJNA445346 | 613       | 667    | MiSeq    | USA     | V3-V6      | colorectal cancer               |
| CS1     | PRJNA383300 | 0         | 94     | MiSeq    | China   | V3-V4      | constipation                    |
| CS2     | PRJNA401944 | 103       | 54     | MiSeq    | China   | V4-V5      | constipation                    |
| DI      | PRJNA275256 | 0         | 60     | MiSeq    | China   | V3-V4      | diarrhea                        |
| DI1     | PRJNA416445 | 28        | 52     | MiSeq    | Spain   | V4         | diarrhea                        |
| Dp      | PRJNA251678 | 0         | 5      | 454      | China   | V1-V3      | depression                      |
| E       | PRJNA318088 | 21        | 11     | MiSeq    | China   | V4-V5      | environment                     |
| EN      | PRJNA379186 | 30        | 144    | MiSeq    | China   | V4         | E. vermicularis infection       |
| EP      | PRJNA362482 | 30        | 28     | MiSeq    | China   | V4-V5      | refractory epilepsy             |

|      |             |      |     |       |        |       |                               |
|------|-------------|------|-----|-------|--------|-------|-------------------------------|
| GDM  | PRJNA418057 | 93   | 93  | MiSeq | China  | V3-V4 | gestational diabetes mellitus |
| GDM1 | PRJNA438491 | 0    | 82  | MiSeq | Italy  | V3-V4 | gestational diabetes mellitus |
| GT   | PRJNA359624 | 26   | 26  | MiSeq | China  | V3-V4 | gout                          |
| H1   | PRJNA388732 | 104  | 0   | MiSeq | China  | V4    | health                        |
| H10  | PRJNA418394 | 20   | 0   | MiSeq | China  | V3-V4 | health                        |
| H11  | PRJEB23227  | 24   | 0   | MiSeq | China  | V4-V5 | health                        |
| H12  | PRJNA388322 | 50   | 0   | MiSeq | China  | V1-V2 | health                        |
| H13  | PRJDB4360   | 469  | 0   | MiSeq | Japan  | V3-V4 | health                        |
| H2   | SRP012940   | 77   | 0   | 454   | China  | V1-V2 | health                        |
| H3   | PRJNA386614 | 65   | 0   | MiSeq | China  | V3-V4 | health                        |
| H4   | PRJNA314010 | 36   | 0   | 454   | China  | V1-V2 | health                        |
| H5   | PRJNA385551 | 1352 | 0   | MiSeq | China  | V3-V4 | health                        |
| H6   | PRJNA349463 | 120  | 0   | MiSeq | China  | V4    | health                        |
| H7   | PRJNA234071 | 35   | 0   | 454   | China  | V1-V3 | health                        |
| H8   | PRJNA414683 | 134  | 0   | MiSeq | USA    | V3-V4 | health                        |
| H9   | PRJNA324452 | 168  | 0   | MiSeq | China  | V4-V5 | health                        |
| HCC  | PRJEB8708   | 0    | 15  | MiSeq | China  | V3-V4 | hepatocellular carcinoma      |
| HCC1 | PRJNA445357 | 0    | 26  | MiSeq | Japan  | V3-V4 | hepatocellular carcinoma      |
| HIV  | PRJNA328008 | 0    | 62  | MiSeq | France | V3    | human immunodeficiency virus  |
| HIV1 | PRJNA233597 | 15   | 21  | 454   | USA    | V3-V5 | human immunodeficiency virus  |
| HIV2 | PRJEB4335   | 13   | 23  | MiSeq | USA    | V4    | human immunodeficiency virus  |
| HIV3 | PRJNA307231 | 34   | 205 | MiSeq | Spain  | V3-V4 | human immunodeficiency virus  |
| IBD  | PRJNA431126 | 38   | 286 | MiSeq | China  | V4    | inflammatory bowel disease    |
| K    | PRJNA382644 | 13   | 13  | HiSeq | China  | V3-V4 | kidney stones                 |
| LC   | PRJNA445763 | 20   | 36  | MiSeq | China  | V3-V4 | liver cirrhosis               |
| LE1  | PRJNA451154 | 0    | 116 | MiSeq | USA    | V4    | acute lymphoblastic leukemia  |
| LE2  | PRJNA449103 | 0    | 406 | MiSeq | USA    | V1-V3 | acute lymphoblastic leukemia  |
| M    | PRJNA388136 | 20   | 20  | HiSeq | China  | V4    | half-marathon runners         |
| MD   | PRJNA278793 | 0    | 114 | MiSeq | China  | V4    | mental disorders              |
| MHE  | PRJNA174838 | 26   | 51  | 454   | China  | V1-V2 | human monocytic ehrlichiosis  |

|      |             |     |     |         |         |            |                               |
|------|-------------|-----|-----|---------|---------|------------|-------------------------------|
| NASH | PRJDB2229   | 23  | 32  | 454     | China   | V1-V2      | Non-alcoholic steatohepatitis |
| OB1  | PRJNA486071 | 39  | 38  | MiSeq   | China   | V4         | obesity                       |
| OB2  | PRJNA401981 | 40  | 40  | MiSeq   | USA     | V3-V4      | obesity                       |
| OB3  | PRJNA433269 | 76  | 96  | PGM     | Mexico  | V3         | obesity                       |
| OB4  | PRJNA339739 | 78  | 112 | PGM     | Mexico  | V3         | obesity                       |
| OS   | PRJNA359375 | 6   | 12  | MiSeq   | China   | V3-V4      | Prader-Willi syndrome         |
| PCOS | PRJNA341567 | 15  | 33  | MiSeq   | China   | V3-V4      | polycystic ovary syndrome     |
| PD1  | PRJEB4927   | 74  | 74  | 454     | Finland | V1-V3      | Parkinsons disease            |
| PR   | PRJNA360073 | 201 | 255 | PGM     | Denmark | V3         | probiotics                    |
| SBS1 | PRJNA434046 | 0   | 66  | MiSeq   | China   | V1         | short bowel syndrome          |
| SBS2 | PRJDB4453   | 3   | 21  | MiSeq   | Japan   | V3-V4      | short bowel syndrome          |
| SBS3 | PRJNA275923 | 7   | 11  | MiSeq   | Sweden  | V2-V4      | short bowel syndrome          |
| SBS4 | PRJNA309478 | 5   | 28  | MiSeq   | China   | V4-V5      | short bowel syndrome          |
| SBS5 | PRJDB4453   | 0   | 24  | MiSeq   | Japan   | V3-V4      | short bowel syndrome          |
| T2D  | PRJNA217953 | 144 | 144 | 454     | China   | V3         | type 2 diabetes               |
| TC   | PRJNA477766 | 40  | 30  | HiSeq   | China   | V3-V4      | thyroid carcinoma             |
| W    | PRJEB12320  | 38  | 60  | MiSeq   | China   | V3-V4      | Whipple surgery               |
| CRC  | PRJNA763023 | 20  | 20  | NovaSeq | China   | metagenome | colorectal cancer             |

---

**Supplementary Table 2. AUC of simulated datasets under different noise levels.**

| <b>Permutation</b> | <b>NetMoss</b> | <b>NESH</b> | <b>JEI</b> |
|--------------------|----------------|-------------|------------|
| 1                  | 0.91           | 0.86        | 0.86       |
| 2                  | 0.98           | 0.85        | 0.85       |
| 3                  | 0.93           | 0.85        | 0.79       |
| 4                  | 0.94           | 0.68        | 0.48       |
| 5                  | 0.92           | 0.86        | 0.86       |
| 6                  | 0.99           | 0.92        | 0.83       |
| 7                  | 0.98           | 0.92        | 0.89       |
| 8                  | 0.96           | 0.91        | 0.59       |
| 9                  | 0.99           | 0.94        | 0.86       |
| 10                 | 0.95           | 0.96        | 0.70       |
